# Supplementary material for: TAp73 is a marker of glutamine addiction in medulloblastoma
Source: PubMed Central journal article supplement (PMC5666673; doi:10.1101/gad.302349.117), 2017-09-01
Supplement: supp_gad.302349.117_Supplemental_Fig1.pdf [file supp_gad.302349.117_Supplemental_Fig1.pdf]

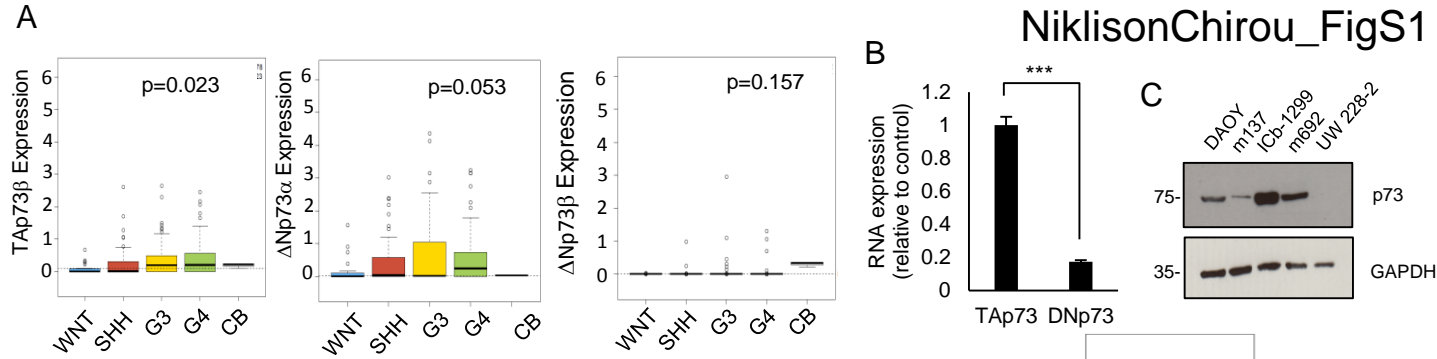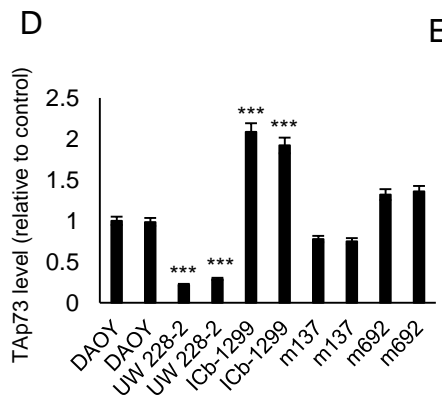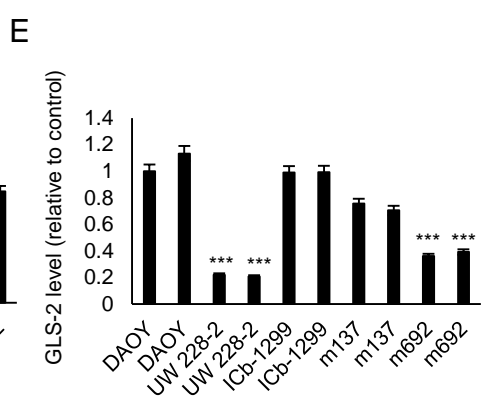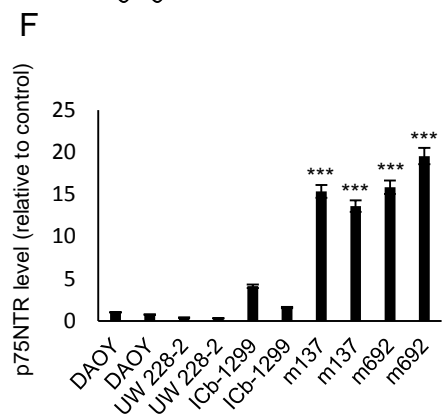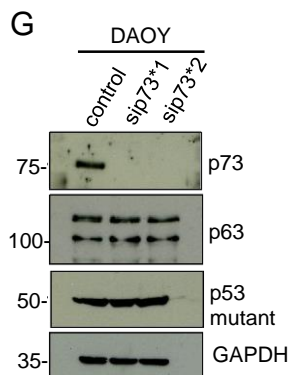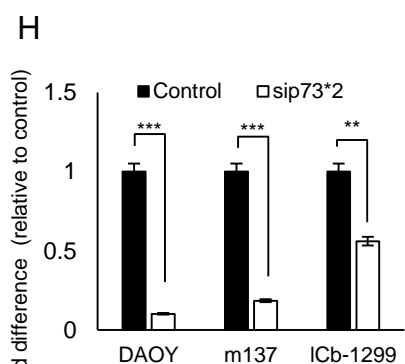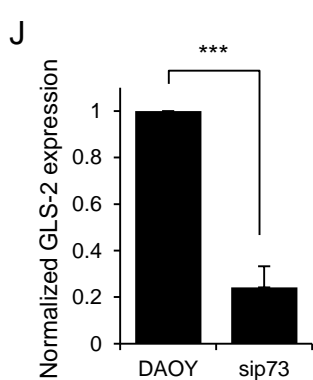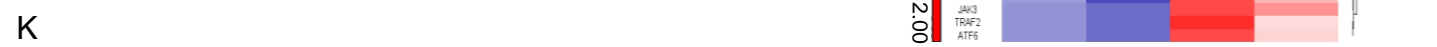

|         | Fold difference (relative to control) |         |       |      |      |      |      |      |       |      |      |      |      |      |       |  |
|---------|---------------------------------------|---------|-------|------|------|------|------|------|-------|------|------|------|------|------|-------|--|
| Sample  | TAp73                                 | GADD45B | GLS-2 | ASL  | SFN  | PFKM | ACO2 | NOS2 | PhKA1 | NBN  | ENO2 | AKT2 | SDHA | CS   | RAD50 |  |
| Control | 1                                     | 1       | 1     | 1    | 1    | 1    | 1    | 1    | 1     | 1    | 1    | 1    | 1    | 1    | 1     |  |
| 10h     | 0.37                                  | 0.22    | 0.35  | 0.44 | 0.51 | 0.64 | 0.65 | 0.68 | 0.76  | 0.94 | 1.06 | 1.12 | 1.25 | 1.67 | 1.11  |  |
| 24h     | 0.54                                  | 0.29    | 0.35  | 0.29 | 0.90 | 0.27 | 0.64 | 1.16 | 0.90  | 0.65 | 0.76 | 0.78 | 1.05 | 1.07 | 1.42  |  |
| 48h     | 0.31                                  | 0.18    | 0.43  | 0.31 | 0.35 | 0.37 | 0.42 | 0.82 | 0.68  | 0.45 | 0.81 | 0.79 | 0.76 | 0.75 | 1.05  |  |
