# Supplementary material for: TAp73 is a marker of glutamine addiction in medulloblastoma
Source: PubMed Central journal article supplement (PMC5666673; doi:10.1101/gad.302349.117), 2017-09-01

A

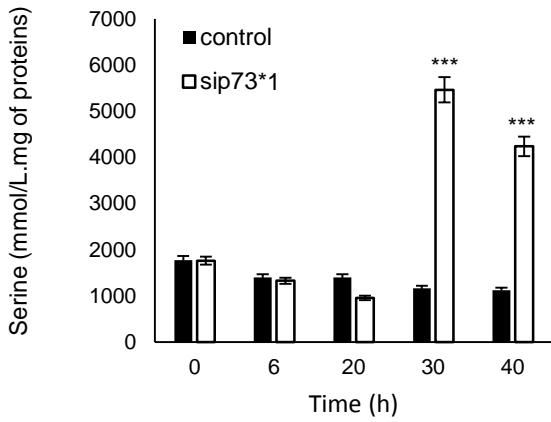

B

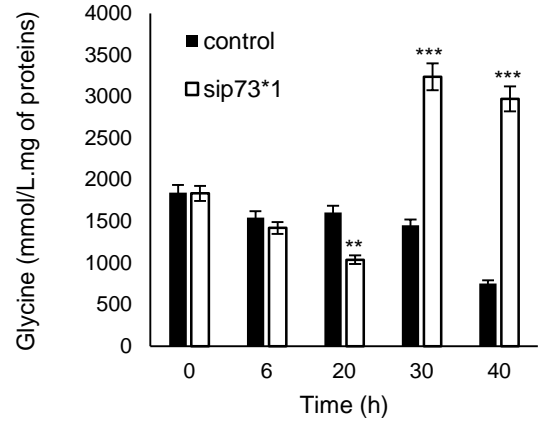

C

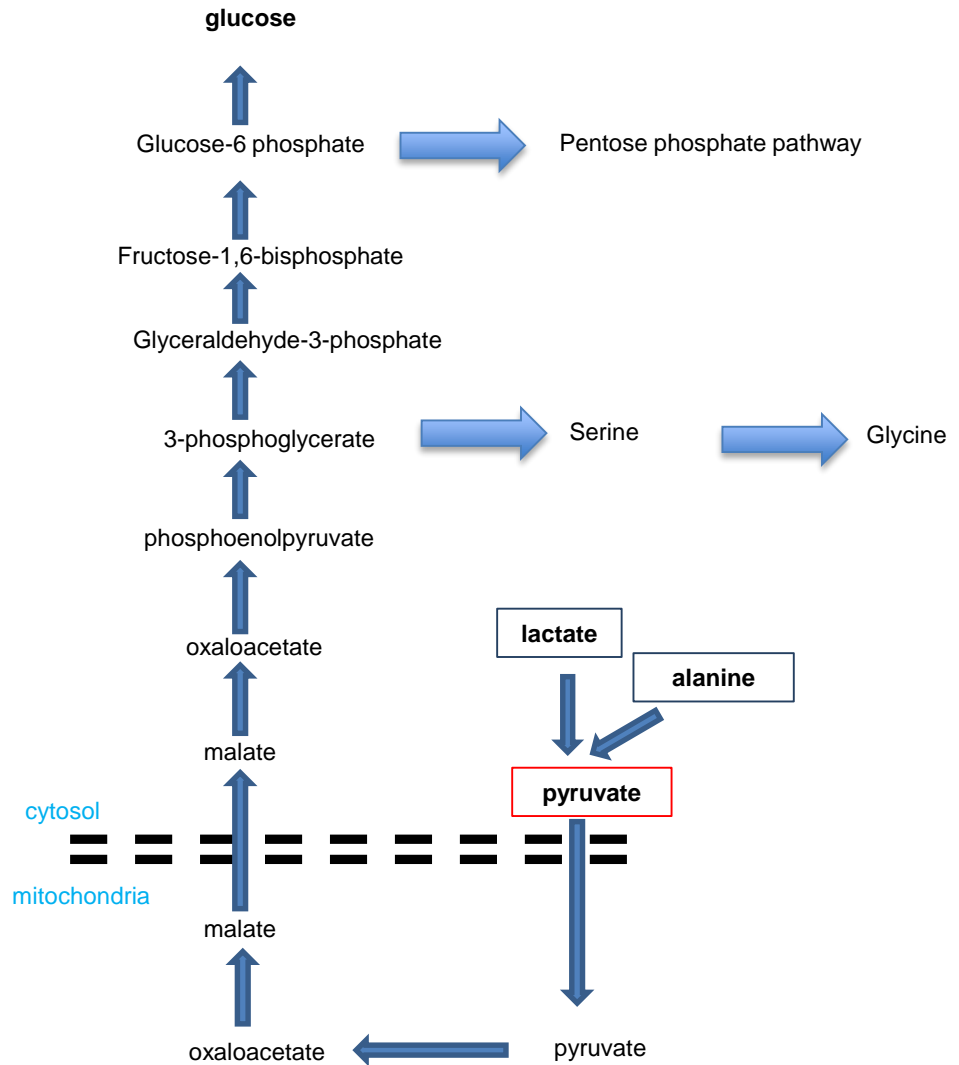

Supplement: supp_gad.302349.117_Supplemental_Fig3.pdf [file supp_gad.302349.117_Supplemental_Fig3.pdf]
