# Supplementary material for: TAp73 is a marker of glutamine addiction in medulloblastoma
Source: PubMed Central journal article supplement (PMC5666673; doi:10.1101/gad.302349.117), 2017-09-01
Supplement: supp_gad.302349.117_Supplemental_Fig6.pdf [file supp_gad.302349.117_Supplemental_Fig6.pdf]

A

|                    | Geometric Mean |               |              |
|--------------------|----------------|---------------|--------------|
|                    | 12h            | 24h           | 12h + NAC    |
| DAOY Control       | 7.715 ± 0.4    | 15.26 ± 2.5   | 7.035 ± 0.5  |
| DAOY Glc starv     | 32.966 ± 2.0   | 69.6 ± 27.8   | 14.85 ± 0.45 |
| DAOY Gln starv     | 41.475 ± 12.2  | 158.33 ± 21.3 | 9.92 ± 2.58  |
| DAOY Ser/Gly starv | 47.325 ± 11.9  | 164.6 ± 27.5  | 5.175 ± 0.3  |
